# Supplementary material for: B4C nanosheets decorated within situ-derived boron-doped graphene quantum dots for high-efficiency ambient N2fixation
Source: Royal Society of Chemistry journal article supplement (doi:10.1039/c9cc03413g), 2019-01-01
Supplement: c9cc03413g1.pdf [file c9cc03413g1.pdf]

Electronic Supplementary Material (ESI) for ChemComm.

**B<sub>4</sub>C nanosheets decorated with in situ-derived boron-doped graphene quantum dots for high-efficiency ambient N<sub>2</sub> fixation**

Wei-Bin Qiu,<sup>a</sup> Yu-Xi Luo,<sup>a</sup> Ru-Ping Liang,<sup>\*a</sup> Jian-Ding Qiu<sup>\*ab</sup> and Xing-Hua Xia<sup>\*c</sup>

<sup>a</sup> College of Chemistry, Nanchang University, Nanchang 330031, China.

<sup>b</sup> College of Materials and Chemical Engineering, Pingxiang University, Pingxiang 337055, China.

<sup>c</sup> State Key Laboratory of Analytical Chemistry for Life Science, School of Chemistry and Chemical Engineering, Nanjing University, Nanjing 210023, China.

\*Corresponding authors. Tel/Fax: +86-791-83969518. E-mail: rpliang@ncu.edu.cn; jdqiu@ncu.edu.cn;

xhxia@nju.edu.cn.

## Experimental section

*Materials.* Sodium nitroferricyanide ( $C_5FeN_6Na_2O$ ) and Nafion 211 membrane were provided by Sigma-Aldrich. Sodium hydroxide (NaOH), salicylic acid ( $C_7H_6O_3$ ), sodium salicylate ( $C_7H_5O_3Na$ ), sodium hypochlorite (NaClO), sodium sulfate ( $Na_2SO_4$ ), nitric acid ( $HNO_3$ ), sulfuric acid ( $H_2SO_4$ ), para-(dimethylamino) benzaldehyde ( $C_9H_{11}NO$ ), hydrochloric acid (HCl), ethanol ( $C_2H_5OH$ ), and hydrazine ( $N_2H_4$ ) were purchased from Sinopharm Chemical Reagent Co. Ltd. (China). Boron carbide ( $B_4C$ ) and Ammonium chloride- $^{15}N$  ( $^{15}NH_4Cl$ ) were purchased from Aladdin Ltd. Dimethyl Sulfoxide- $D_6$  (DMSO- $d_6$ , 99.9%) was purchased from Adamas Reagent, Ltd. All the chemical reagents were of analytical grade and used as received without further purification. Deionized water was purified through a Millipore Milli-Q system.

*Preparation of  $B_4C$  nanosheet.* A 4 g bulk  $B_4C$  was dispersed in 100 mL ethanol and stripped by ultrasonic cell disruptor for 1 h. Subsequently, the resulting dispersion was centrifuged for 10 min at 3000 rpm and the supernatant containing  $B_4C$  nanosheet was decanted gently. The product was dried in a vacuum at 60 °C.

*Preparation of  $B_4C$ -BGQDs.*  $B_4C$ -BGQDs was fabricated by in situ formation of BG on  $B_4C$  nanosheets through a structural conversion way followed by cutting of BG into BGQDs. The obtained  $B_4C$  nanosheets were subjected to heat treatment (1600 °C) using a single-zone tubular furnace in an inert atmosphere ( $N_2$  gas atmosphere) for 3 h, and were then allowed to cool slowly to room temperature. The BG was cutted into BGQDs by a hydrothermal cutting process.<sup>1</sup> Typically, the as-made powder was first refluxed in 40%  $HNO_3$  for 24 h; after filtration and water washing to neutral, the product was dried in a vacuum at 60 °C. Then, the product was heated to 300 °C with a heating rate of 5 °C/min and then maintained at 300 °C for 2 h in a tube furnace under an argon atmosphere. The sample was oxidized with concentrated  $H_2SO_4$  and  $HNO_3$  (volume ratio 1:3) for 17 h under mild ultrasonication without any pausing. The solution was separated and collected by centrifugation (5000 rpm for 20 min), followed by washing with ethanol, and then redispersed in 40 mL of ultrapure water. The pH was adjusted to 8 with NaOH. The solution was then put into a poly(tetrafluoroethylene) (Teflon)-lined autoclave and heated at 200 °C for 11.5 h.

The precipitate was collected and washed with water and ethanol for several times by centrifugation and dried at 60 °C. The supernatant containing BGQDs was further characterized by fluorescence spectrum and atomic force microscopy (AFM) to confirm the formation of BGQDs.

*Characterization.* Fluorescence spectrum was obtained using an F-7000 fluorescence spectrometer (Hitachi, Japan). AFM image was collected on a Bruker Multimode 8 AFM/SPM (Bruker, Germany) system with NanoScope Analysis Version 1.40 software. The X-ray diffraction analysis (XRD) was performed on a Bruker D8 Advance X-ray diffractometer with Cu K $\alpha$  ( $\alpha = 1.5405 \text{ \AA}$ ) radiation. JEOL2010 transmission electron microscope (TEM, Japan) was used to characterize the size and morphology of B<sub>4</sub>C-BGQDs. Raman spectrum was collected using a Renishaw InVia micro-Raman (Renishaw, UK) system with the excitation wavelength at 514 nm. The absorbance data of spectrophotometer were measured on an UV-2450 spectrophotometer (Shimadzu, Japan). X-ray photoelectron spectroscopy (XPS) characterizations were measured by a VG Multilab 2000X instrument (Thermal Electron, USA). N<sub>2</sub> temperature programmed desorption (N<sub>2</sub>-TPD) was measured with a Micromeritics AutoChem 2920 apparatus to ascertain the N<sub>2</sub> adsorption ability of the catalysts. Briefly, 40 mg of the catalyst was first pre-treated with pure He at a flow rate of 50 mL·min<sup>-1</sup> at 120 °C for 30 min, followed by cooling down to room temperature under the same atmosphere and then dosed with pure N<sub>2</sub>. To remove residual N<sub>2</sub>, the catalyst was purged with pure He at a flow rate of 50 mL·min<sup>-1</sup> for 30 min. The N<sub>2</sub>-TPD measurement was subsequently performed up to 600 °C at a heating rate of 10 °C·min<sup>-1</sup> in pure He. A gas chromatograph (SHIMADZU, GC-2014C) equipped with MolSieve 5A column and Ar carrier gas was used for the periodic quantification of H<sub>2</sub> during NRR tests using B<sub>4</sub>C-BGQDs/CPE

*Electrochemical measurement.* The reduction of N<sub>2</sub> gas (99.99%) was carried out in a two-compartment cell under ambient condition, which was separated by a Nafion 211 membrane. Before NRR tests, the membrane was protonated by first boiling in ultrapure water for 1 h and treating in H<sub>2</sub>O<sub>2</sub> (5%) aqueous solution at 80 °C for another 1 h. Finally, the membrane was treated in 0.5 M H<sub>2</sub>SO<sub>4</sub> at 80 °C for 3 h and in

water for 6 h. Electrochemical measurements were performed with an Iviumstat electrochemical workstation (Eco Chemie, Netherlands) in a standard three-electrode system using B<sub>4</sub>C-BGQDs as the working electrode, Ag/AgCl as the reference, and a graphite rod as the counter electrode. All experiments were carried out at room temperature (25 °C). To acquire the ESA of the working electrodes, their roughness factor (R<sub>f</sub>) should be obtained firstly according to the equation:  $ESA=R_fS$ , where S was generally equal to the geometric area of carbon paper electrode (In this work,  $S=1\text{ cm}^2$ ). The R<sub>f</sub> was determined by the relation  $R_f=C_{dl}/30\text{ }\mu\text{F cm}^{-2}$  based on the double-layer capacitance ( $C_{dl}$ ) of a smooth metal-free surface ( $30\text{ }\mu\text{F cm}^{-2}$ ).<sup>2</sup> The  $C_{dl}$  was determined by measuring the capacitive current associated with double-layer charging from the scan-rate dependence of cyclic voltammetric stripping. For this, the potential window of cyclic voltammetric stripping was  $-0.25\text{ V}$  to  $-0.15\text{ V}$  (0.1 M HCl solution). The scan rates were  $10\text{ mV s}^{-1}$ ,  $20\text{ mV s}^{-1}$ ,  $50\text{ mV s}^{-1}$ ,  $100\text{ mV s}^{-1}$ . The  $C_{dl}$  was estimated by plotting the  $\Delta j=(j_a-j_c)$  at  $-0.2\text{ V}$  (where  $j_c$  and  $j_a$  are the cathodic and anodic current densities, respectively) against the scan rate, in which the slope was twice that of  $C_{dl}$ .<sup>3</sup> Electrochemical impedance spectroscopy (EIS) tests were performed in a 0.1 M HCl solution at  $-0.45\text{ V}$  in the frequency range from 0.1 to  $10^6$  Hz. Linear sweep voltammogram (LSV) tests were performed in a 0.1 M HCl solution at a scan rate of  $5\text{ mV s}^{-1}$ . The provided LSV curves were the steady-state ones after several cycles. For N<sub>2</sub> reduction experiments, the cathode chamber was first purged with N<sub>2</sub> for 30 min before measurement to form N<sub>2</sub>-saturated solution, then conducted in 0.1 M HCl with continuous N<sub>2</sub> bubbling. All potentials ( $E$ ) in this study were recorded on a reversible hydrogen electrode (RHE) by the equation:

$$E_{\text{RHE}} = E_{\text{Ag/AgCl}} + 0.059\text{ pH} + 0.256\text{ V} \quad (\text{S-1})$$

*Determination of NH<sub>3</sub>.* The concentration of produced NH<sub>3</sub> was determined by the indophenol blue method.<sup>4</sup> In detail, 2 mL HCl electrolyte was taken from the cathodic chamber, and then 2 mL of 1 M NaOH solution containing 5% C<sub>7</sub>H<sub>6</sub>O<sub>3</sub> and 5% C<sub>7</sub>H<sub>5</sub>O<sub>3</sub>Na were added into this solution. Subsequently, 1 mL of 0.05 M NaClO and 0.2 mL of 1% C<sub>5</sub>FeN<sub>6</sub>Na<sub>2</sub>O·2H<sub>2</sub>O were added into the above solution. After standing

at room temperature for 2 h, UV-Vis absorption spectrum was measured at a wavelength of 655 nm. The concentration-absorbance curves were calibrated using the standard NH<sub>3</sub> solution with a series of concentrations. The fitting curve (Fig. S5,  $y = 0.330x + 0.009$ ,  $R^2 = 0.999$ ) shows good linear relation of the absorbance value with NH<sub>3</sub> concentration by three times independent calibrations.

*Determination of N<sub>2</sub>H<sub>4</sub>.* The N<sub>2</sub>H<sub>4</sub> concentration in the electrolyte was estimated by the method of Watt and Chrisp.<sup>5</sup> In brief, a mixture solution containing C<sub>9</sub>H<sub>11</sub>NO (5.99 g), concentrated HCl (30 mL) and C<sub>2</sub>H<sub>5</sub>OH (300 mL) was used as a color reagent. Then, 5 mL of electrolyte after electrolysis was added into the 5 mL of above color reagent with stirring at room temperature for 20 min. The absorbance of the resulting solution was measured by an UV-Vis spectrophotometer at a wavelength of 455 nm. The concentration-absorbance curve was calibrated using standard N<sub>2</sub>H<sub>4</sub> solutions with a series of concentrations (0–0.6 μg ml<sup>-1</sup>) for three independent calibrations. The fitting curve (Fig. S6,  $y = 0.900x + 0.026$ ,  $R^2 = 0.999$ ) shows good linear relation of absorbance value with N<sub>2</sub>H<sub>4</sub> concentration by three times independent calibrations.

*<sup>15</sup>N<sub>2</sub> Isotope Labeling Experiments.* The isotopic labeling experiment was carried out using <sup>15</sup>N<sub>2</sub> as the feeding gas (Sigma-Aldrich, 98 atom % <sup>15</sup>N<sub>2</sub>) with 0.1 M HCl electrolyte. After <sup>15</sup>N<sub>2</sub> electroreduction for 2 h at -0.45 V (vs. RHE), the electrolyte was taken out and concentrated to 1 mL by a rotary evaporator at 70 °C. Afterwards, 0.9 mL of the resulting solution was taken out and mixed with 0.1 mL DMSO-*d*<sub>6</sub> as an internal standard for <sup>1</sup>H nuclear magnetic resonance measurement (<sup>1</sup>H NMR, Bruker Avance III 600 MHz).

*Calculations of NH<sub>3</sub> yield and Faradaic efficiency (FE).* The FE for N<sub>2</sub> reduction was defined as the amount of electric charge used for synthesizing NH<sub>3</sub> divided by the total charge passed through the electrodes during the electrolysis. The total amount of NH<sub>3</sub> produced was measured using a colorimetric method. Assuming three electrons were needed to produce one NH<sub>3</sub> molecule, the rate of NH<sub>3</sub> formation ( $v_{\text{NH}_3}$ ) was calculated using the following equation:

$$v_{\text{NH}_3} = \frac{C_{\text{NH}_3} \times V}{t \times m_{\text{cat.}}} \quad (\text{S-2})$$

The FE for  $\text{NH}_3$  formation ( $\text{FE}_{\text{NRR}}$ ) could be calculated as follows:

$$\text{FE}_{\text{NRR}} = \frac{3 \times F \times C_{\text{NH}_3} \times V}{17 \times Q} \quad (\text{S-3})$$

where,  $F$  is the Faraday constant,  $C_{\text{NH}_3}$  is the measured  $\text{NH}_3$  concentration,  $V$  is the volume of the  $\text{HCl}$  electrolyte for  $\text{NH}_3$  collection,  $t$  is the reduction time (2 h) and  $m_{\text{cat.}}$  is the catalyst loading mass,  $Q$  is the total charge passed through the electrode (C).

FE for  $\text{H}_2$  ( $\text{FE}_{\text{HER}}$ ) was calculated according to following equation:

$$\text{FE}_{\text{HER}} = 2 \times F \times n / Q \quad (\text{S-4})$$

where  $F$  is the Faraday constant,  $n$  is the actually produced  $\text{H}_2$  (mol), and  $Q$  is the total charge passed through the electrode (C).

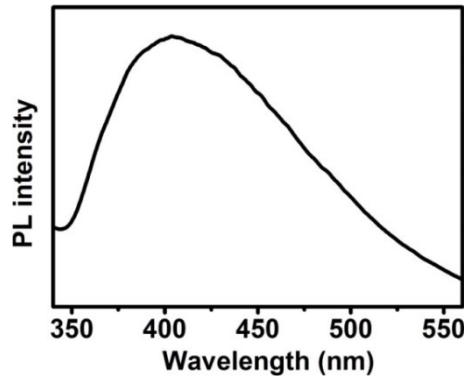

**Fig. S1.** Photoluminescence spectrum of BGQDs with a 310 nm excitation beam.

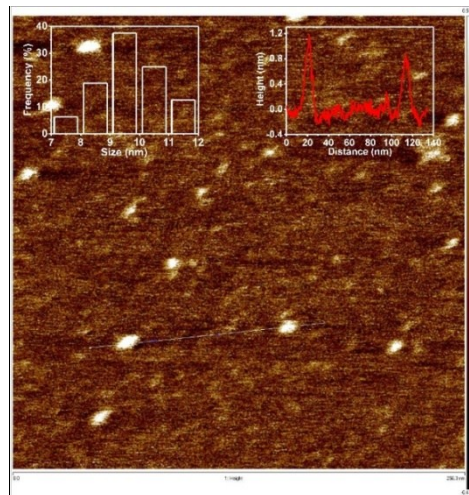

**Fig. S2.** AFM image of the dispersive BGQDs deposited on a freshly cleaved mica. The insets show a particle size histogram (left inset) and the height distribution of the BGQDs (right inset). The average particle size of BGQDs is about 10 nm.

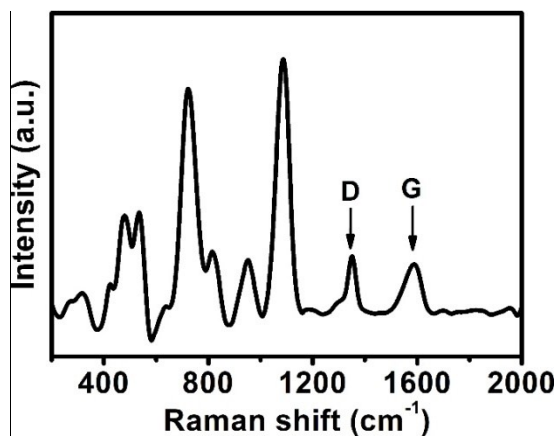

**Fig. S3.** Raman spectrum of B<sub>4</sub>C-BGQDs.

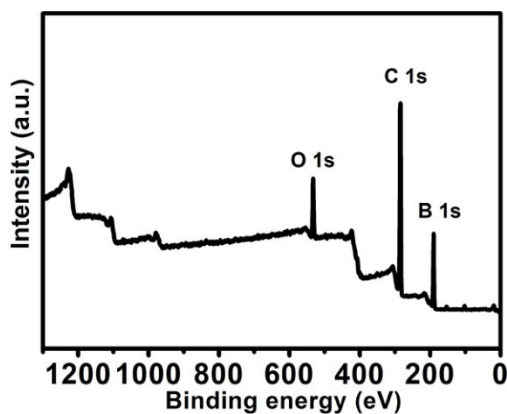

**Fig. S4.** XPS survey spectra of B<sub>4</sub>C-BGQDs.

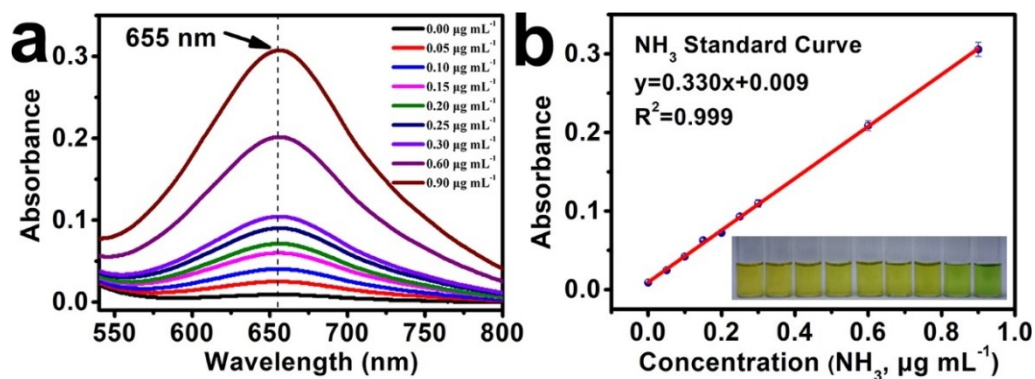

**Fig. S5.** Absolute calibration of the indophenol blue method using ammonium chloride solutions with a series of NH<sub>3</sub> concentrations as standard. (a) UV-Vis absorption spectra of indophenol assays with NH<sub>3</sub> after incubated at room temperature

for 2 h. (b) Calibration curve ( $y = 0.330x + 0.009$ ,  $R^2 = 0.999$ ) used for estimation of  $\text{NH}_3$ . The inset in (b) shows the chromogenic reaction of indophenol indicator with  $\text{NH}_3$ .

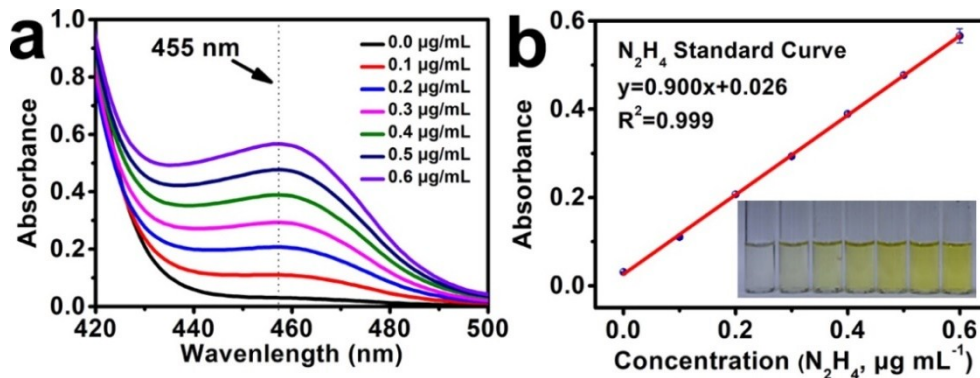

**Fig. S6.** Absolute calibration of the Watt and Chrisp method for estimating  $\text{N}_2\text{H}_4$  concentration, using  $\text{N}_2\text{H}_4$  solutions with known concentration as standard. (a) UV-Vis absorption spectra of various  $\text{N}_2\text{H}_4$  concentration after incubated at room temperature for 20 min. (b) Calibration curve ( $y = 0.900x + 0.026$ ,  $R^2 = 0.999$ ) used for calculation of  $\text{N}_2\text{H}_4$  concentration. The inset in (b) shows the chromogenic reaction of para-dimethylamino-benzaldehyde indicator with  $\text{N}_2\text{H}_4 \cdot \text{H}_2\text{O}$ .

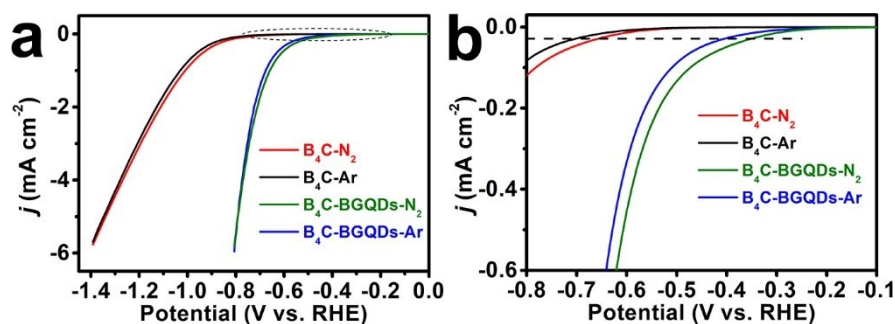

**Fig. S7.** (a) Linear sweep voltammograms (sweep rate  $5 \text{ mV s}^{-1}$ ) of  $\text{B}_4\text{C}$  nanosheets/CPE and  $\text{B}_4\text{C-BGQDs/CPE}$  electrode recorded in  $\text{N}_2$ -saturated and Ar-saturated  $0.1 \text{ M HCl}$  solution respectively. (b) A magnified view of the dotted line part in (a).

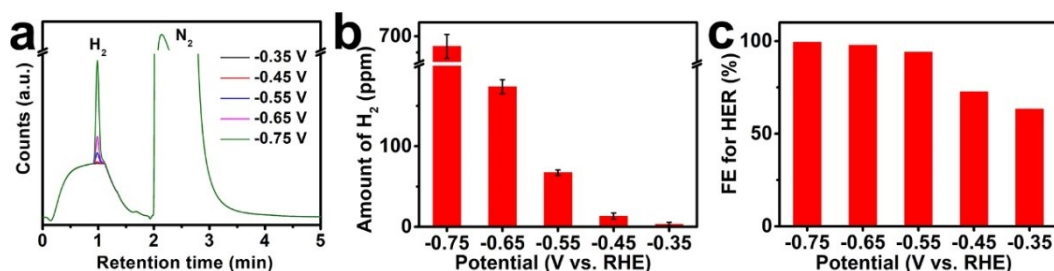



**Fig. S8.** (a) Gas chromatography (GC) spectra of as-generated gas for the NRR on B<sub>4</sub>C-BGQDs/CPE catalyst in N<sub>2</sub>-saturated 0.1 M HCl at various potentials, (b) Amounts of H<sub>2</sub> and (c) the calculated FEs of hydrogen evolution reaction (HER) accordingly.

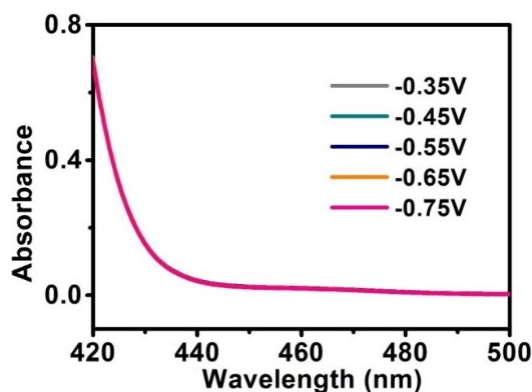

**Fig. S9.** UV-Vis absorption spectra of the electrolytes stained with para-(dimethylamino) benzaldehyde indicator after electrolysis at a series of potentials for 20 min.

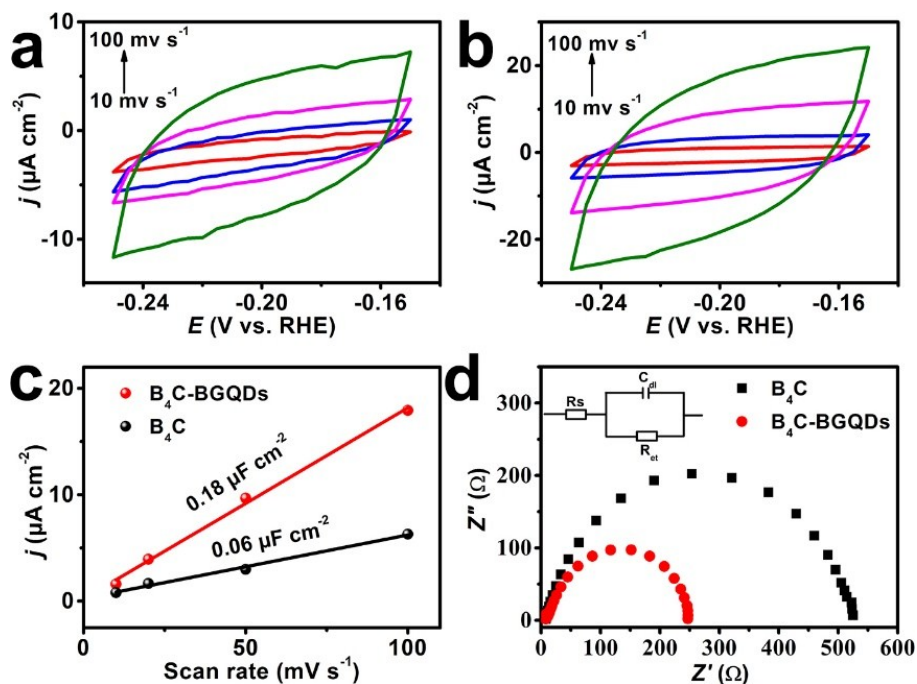

**Fig. S10.** CV curves for (a) B<sub>4</sub>C nanosheets/CPE and (b) B<sub>4</sub>C-BGQDs/CPE at scan rates of 10, 20, 50, and 100 mV s<sup>-1</sup>. (c) Corresponding capacitive currents at -0.2 V as a function of scan rate for B<sub>4</sub>C nanosheets/CPE and B<sub>4</sub>C-BGQDs/CPE. (d) Nyquist plots of B<sub>4</sub>C nanosheets/CPE and B<sub>4</sub>C-BGQDs/CPE at -0.45 V in the frequency

range from 0.1 to  $10^6$  Hz. Inset shows the equivalent circuit used to model the impedance data. All experiments were carried out in 0.1 M HCl.

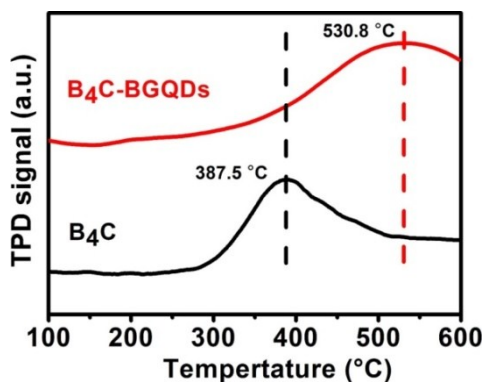

**Fig. S11.** N<sub>2</sub>-TPD profiles of B<sub>4</sub>C and B<sub>4</sub>C-BGQDs.

To verify the effective NH<sub>3</sub> molecules detected mainly from the electrocatalyzed conversion of N<sub>2</sub> over B<sub>4</sub>C-BGQDs/CPE, some necessary control experiments were carried out. Specifically, we performed electrolysis in N<sub>2</sub>-saturated 0.1 M HCl solution at an open circuit potential and in Ar-saturated electrolyte at -0.45 V (Fig. S12). Specifically, no apparent NH<sub>3</sub> is detected in the electrolyte after two hours of electrolysis when N<sub>2</sub> is replaced by Ar and at open circuit potential, indirectly indicating that the detected NH<sub>3</sub> stems only from NRR catalyzed by B<sub>4</sub>C-BGQDs/CPE. Moreover, the time-dependent experiment shows that the production of NH<sub>3</sub> actually increases with the reaction time, further confirming that NH<sub>3</sub> molecules mainly originate from N<sub>2</sub> (Fig. S13). Furthermore, <sup>15</sup>N isotopic labeling experiment was performed as an alternative method to verify the N source of the produced NH<sub>3</sub> in 0.1 M HCl electrolyte. A triplet coupling for <sup>14</sup>NH<sub>4</sub><sup>+</sup> and a doublet coupling for <sup>15</sup>NH<sub>4</sub><sup>+</sup> in the <sup>1</sup>H nuclear magnetic resonance (<sup>1</sup>H NMR) spectra are used to distinguish them. As shown in Fig. S14, only <sup>15</sup>NH<sub>4</sub><sup>+</sup> was observed in the electrolyte when <sup>15</sup>N<sub>2</sub> was supplied as the feeding gas, and no NH<sub>4</sub><sup>+</sup> was detected when Ar was supplied, which are consistent with the control experiments and confirm that the NH<sub>3</sub> was produced by B<sub>4</sub>C-BGQDs/CPE-catalyzed electroreduction of N<sub>2</sub>.

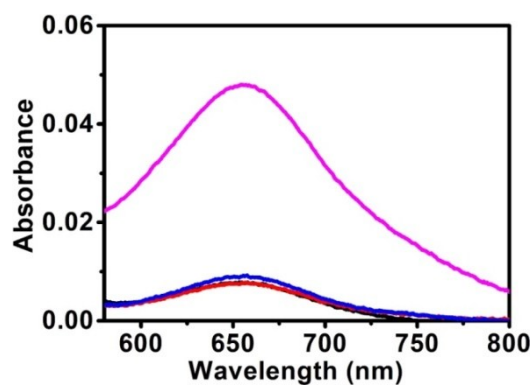

**Fig. S12.** UV-Vis absorption spectra of the electrolytes stained with indophenol indicator for B<sub>4</sub>C-BGQDs/CPE under different conditions. (Color code: black curve, pure electrolyte solution; red curve: N<sub>2</sub>-saturated solution at open circuit potential for 2 h; blue dotted curve: electrolysis in Ar-saturated solution at -0.45 V for 2 h; pink curve: electrolysis in N<sub>2</sub>-saturated solution at -0.45 V for 2 h.)

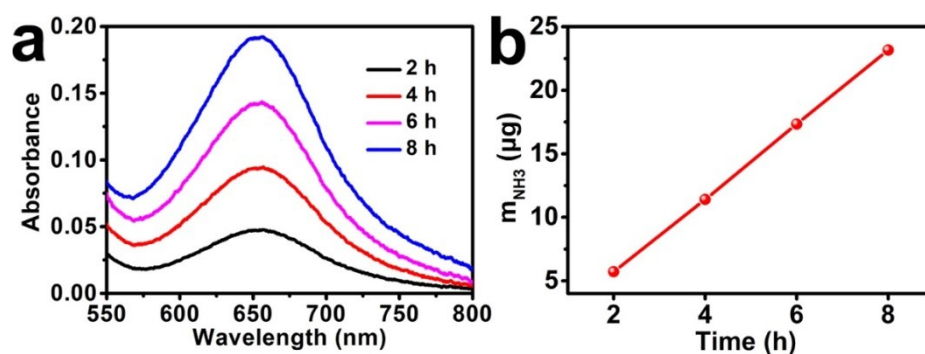

**Fig. S13.** (a) UV-vis absorption spectra of HCl electrolyte after electrolysis on B<sub>4</sub>C-BGQDs/CPE stained with indophenol indicator after charging for different interval times at -0.45 V. (b) The corresponding curve of NH<sub>3</sub> amount vs. reaction time in 0.1 M HCl at -0.45 V.

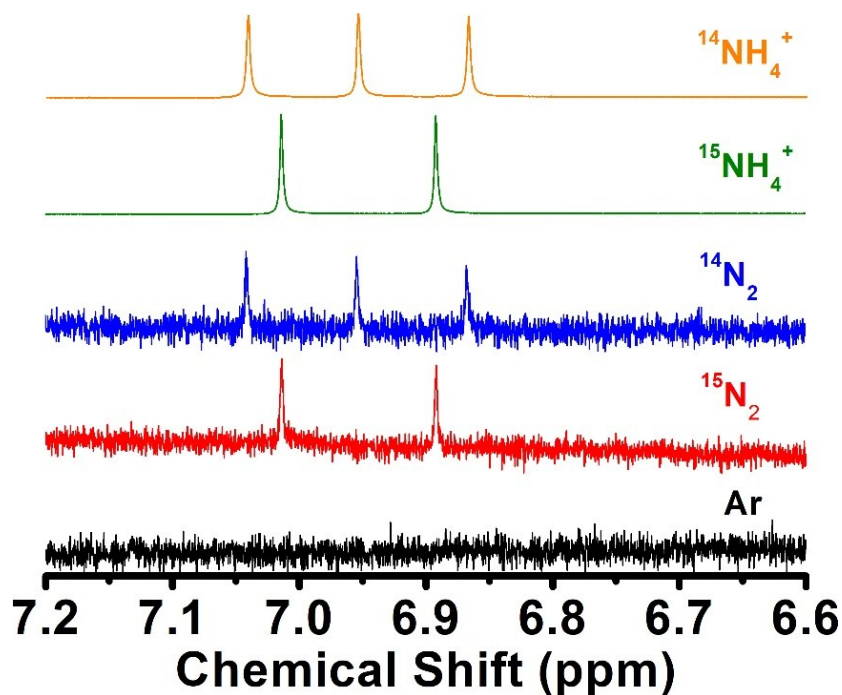

**Fig. S14.**  $^1\text{H}$  NMR spectra were obtained for the post-electrolysis 0.1 M HCl electrolytes with  $^{15}\text{N}_2$ ,  $^{14}\text{N}_2$ , or Ar as the feeding gas. In the  $^1\text{H}$  NMR spectra, a doublet coupling for  $^{15}\text{NH}_4^+$  and a triplet coupling for  $^{14}\text{NH}_4^+$  were distinguished for the  $^{15}\text{N}_2$ - and  $^{14}\text{N}_2$ -saturated electrolytes after electrolysis, confirming that the  $\text{NH}_3$  was produced from the feeding gas. No apparent signals were observed when the electrolyte was bubbled with Ar, indicating a negligible amount of background  $\text{NH}_3$  from the catalyst, the electrolyte or the environment, which is consistent with the control experiment using the indophenol blue method in Fig. S8.

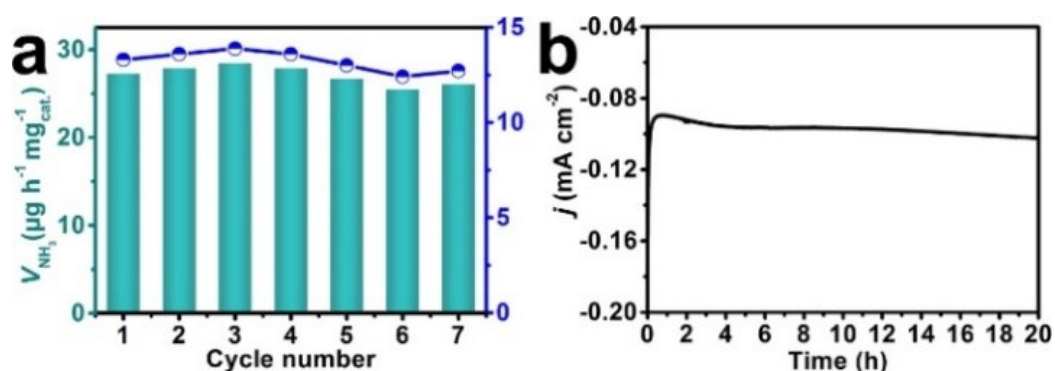

**Fig. S15.** (a) Cycling test of  $\text{B}_4\text{C}$ -BGQDs/CPE at  $-0.45$  V. (b) Chronoamperometry curve of  $\text{B}_4\text{C}$ -BGQDs/CPE for NRR at  $-0.45$  V for 20 h.

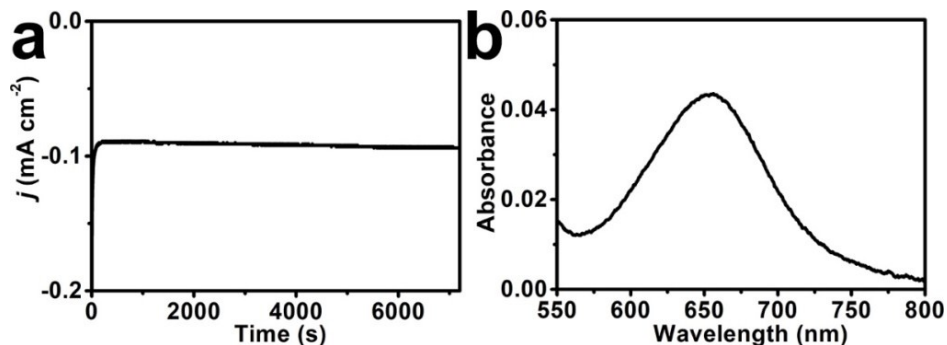

**Fig. S16.** (a) Chronoamperometry curve of B<sub>4</sub>C-BGQDs/CPE after 20-h electrolysis at -0.45 V. (b) UV-Vis absorption spectrum of the corresponding electrolyte.

**Table S1.** Comparison of the electrocatalytic N<sub>2</sub> reduction performance for B<sub>4</sub>C nanosheet with other recently reported the-state-of-art electrocatalysts under ambient conditions.

| Catalyst                           | Electrolyte                                                                     | $V_{\text{NH}_3}$                         | FE (%) | Potential (V vs. RHE)                  | Ref.      |
|------------------------------------|---------------------------------------------------------------------------------|-------------------------------------------|--------|----------------------------------------|-----------|
| Metal-free NRR electrocatalysts    |                                                                                 |                                           |        |                                        |           |
| B <sub>4</sub> C-BGQDs/CPE         | 0.1 M HCl                                                                       | 28.6 $\mu\text{g h}^{-1} \text{mg}^{-1}$  | 16.7   | $V_{\text{NH}_3}$ : -0.45<br>FE: -0.35 | This work |
|                                    |                                                                                 | 2.86 $\mu\text{g h}^{-1} \text{cm}^{-2}$  |        |                                        |           |
| B <sub>4</sub> C/CPE               | 0.1 M HCl                                                                       | 26.57 $\mu\text{g h}^{-1} \text{mg}^{-1}$ | 15.95  | -0.75                                  | 6         |
| Boron-doped graphene               | 0.05 M H <sub>2</sub> SO <sub>4</sub>                                           | 9.8 $\mu\text{g h}^{-1} \text{cm}^{-2}$   | 10.8   | -0.5                                   | 7         |
| PCN-NVs                            | 0.1 M HCl                                                                       | 8.09 $\mu\text{g h}^{-1} \text{mg}^{-1}$  | 11.59  | -0.2                                   | 8         |
| Black phosphorus nanosheets        | 0.01 M HCl                                                                      | 31.37 $\mu\text{g h}^{-1} \text{mg}^{-1}$ | 5.07   | $V_{\text{NH}_3}$ : -0.7<br>FE: -0.6   | 9         |
| NCM                                | 0.1 M HCl                                                                       | 8 $\mu\text{g h}^{-1} \text{cm}^{-2}$     | 5.2    | $V_{\text{NH}_3}$ : -0.3<br>FE: -0.2   | 10        |
| CC-450                             | 0.1 M Na <sub>2</sub> SO <sub>4</sub><br>+0.02 M H <sub>2</sub> SO <sub>4</sub> | 15.85 $\mu\text{g h}^{-1} \text{cm}^{-2}$ | 6.92   | -0.3                                   | 11        |
| NPC-500                            | 0.005 M H <sub>2</sub> SO <sub>4</sub>                                          | 22.3 $\mu\text{g h}^{-1} \text{cm}^{-2}$  | 9.98   | -0.4                                   | 12        |
| PEBCD/C                            | 0.5 M Li <sub>2</sub> SO <sub>4</sub>                                           | 1.58 $\mu\text{g h}^{-1} \text{cm}^{-2}$  | 2.85   | -0.5                                   | 13        |
| N-doped porous carbon              | 0.05 M H <sub>2</sub> SO <sub>4</sub>                                           | 23.80 $\mu\text{g h}^{-1} \text{mg}^{-1}$ | 1.42   | -0.9                                   | 14        |
| ZIF-derived carbon                 | 0.1 M KOH                                                                       | 57.8 $\mu\text{g h}^{-1} \text{cm}^{-2}$  | 10.20  | -0.3                                   | 15        |
| N-doped carbon nanospikes          | 0.25 M LiClO <sub>4</sub>                                                       | 97.18 $\mu\text{g h}^{-1} \text{cm}^{-2}$ | 11.56  | -1.19                                  | 16        |
| Boron Nanosheet                    | 0.1 M Na <sub>2</sub> SO <sub>4</sub>                                           | 13.22 $\mu\text{g h}^{-1} \text{mg}^{-1}$ | 4.04   | -0.8                                   | 17        |
| S dots-graphene nanohybrid         | 0.5 M LiClO <sub>4</sub>                                                        | 28.56 $\mu\text{g h}^{-1} \text{mg}^{-1}$ | 7.07   | -0.85                                  | 18        |
| BCN                                | 0.1 M HCl                                                                       | 7.75 $\mu\text{g h}^{-1} \text{mg}^{-1}$  | 13.79  | -0.3                                   | 19        |
| Metal-based NRR electrocatalysts   |                                                                                 |                                           |        |                                        |           |
| TA-reduced Au/TiO <sub>2</sub>     | 0.1 M HCl                                                                       | 21.4 $\mu\text{g h}^{-1} \text{mg}^{-1}$  | 8.11   | -0.2                                   | 20        |
| $\alpha$ -Au/CeO <sub>x</sub> -RGO | 0.1 M HCl                                                                       | 8.31 $\mu\text{g h}^{-1} \text{mg}^{-1}$  | 10.1   | -0.2                                   | 21        |

|                       |                                         |                                           |       |                                      |    |
|-----------------------|-----------------------------------------|-------------------------------------------|-------|--------------------------------------|----|
| AuHNCs                | 0.5 M LiClO <sub>4</sub>                | 3.90 $\mu\text{g h}^{-1} \text{cm}^{-2}$  | 30.2  | $V_{\text{NH}_3}$ : -0.5<br>FE: -0.4 | 22 |
| Ag-Au@ZIF             | THF-based electrolyte                   | 0.61 $\mu\text{g h}^{-1} \text{cm}^{-2}$  | 18    | N/A                                  | 23 |
| Pd/C                  | 0.1 M PBS                               | 4.5 $\mu\text{g h}^{-1} \text{mg}^{-1}$   | 8.2   | 0.1                                  | 24 |
| Ru/C                  | 2 M KOH                                 | 0.21 $\mu\text{g h}^{-1} \text{cm}^{-2}$  | 0.28  | -1.1                                 | 25 |
| Ru SAs/N-C            | 0.05 M H <sub>2</sub> SO <sub>4</sub>   | 120.9 $\mu\text{g h}^{-1} \text{mg}^{-1}$ | 29.6  | -0.2                                 | 26 |
| BiNCs/CB/CP           | K <sub>2</sub> SO <sub>4</sub> (pH=3.5) | 3400 $\mu\text{g h}^{-1} \text{mg}^{-1}$  | 66    | -0.6                                 | 27 |
| CoO QD/RGO            | 0.1 M Na <sub>2</sub> SO <sub>4</sub>   | 21.5 $\mu\text{g h}^{-1} \text{mg}^{-1}$  | 8.3   | -0.6                                 | 28 |
| Fe <sub>SA</sub> -N-C | 0.1M KOH                                | 7.48 $\mu\text{g h}^{-1} \text{mg}^{-1}$  | 56.55 | 0                                    | 29 |

## References

- 1 L. Zhang, Z.-Y. Zhang, R.-P. Liang, Y.-H. Li and J.-D. Qiu, *Anal. Chem.*, 2014, **86**, 4423–4430.
- 2 A. Chakraborty, R. Devivaraprasad, B. Bera and M. Neergat, *Phys. Chem. Chem. Phys.*, 2017, **19**, 25414–25422.
- 3 S. Gao, X. Jiao, Z. Sun, W. Zhang, Y. Sun, C. Wang, Q. Hu, X. Zu, F. Yang and S. Yang, *Angew. Chem., Int. Ed.*, 2016, **55**, 698–702.
- 4 D. Zhu, L. Zhang, R. E. Ruther and R. J. Hamers, *Nat. Mater.*, 2013, **12**, 836–841.
- 5 G. W. Watt and J. D. Chrisp, *Anal. Chem.*, 1952, **24**, 2006–2008.
- 6 W. Qiu, X. Xie, J. Qiu, W. Fang, R. Liang, X. Ren, X. Ji, G. Cui, A. M. Asiri, G. Cui, B. Tang and X. Sun, *Nat. Commun.*, 2018, **9**, 3485.
- 7 X. M. Yu, P. Han, Z. X. Wei, L. S. Huang, Z. X. Gu, S. J. Peng, J. M. Ma and G. F. Zheng, *Joule*, 2018, **2**, 1610–1622.
- 8 C. D. Lv, Y. M. Qian, C. S. Yan, Y. Ding, Y. Y. Liu, G. Chen and G. H. Yu, *Angew. Chem., Int. Ed.*, 2018, **57**, 10246–10250.
- 9 L. Zhang, L.-X. Ding, G.-F. Chen, X. Yang and H. Wang, *Angew. Chem., Int. Ed.*, 2019, **58**, 2612–2616.
- 10 H. Wang, L. Wang, Q. Wang, S. Ye, W. Sun, Y. Shao, Z. Jiang, Q. Qiao, Y. Zhu, P. Song, D. Li, L. He, X. Zhang, J. Yuan, T. Wu and G. A. Ozin, *Angew. Chem., Int. Ed.*, 2018, **57**, 12360–12364.
- 11 W. Li, T. Wu, S. Zhang, Y. Liu, C. Zhao, G. Liu, G. Wang, H. Zhang and H. Zhao, *Chem. Commun.*, 2018, **54**, 11188–11191.
- 12 C. Zhao, S. Zhang, M. Han, X. Zhang, Y. Liu, W. Li, C. Chen, G. Wang, H. Zhang and H. Zhao, *ACS Energy Lett.*, 2019, **4**, 377–383.
- 13 G.-F. Chen, X. Cao, S. Wu, X. Zeng, L.-X. Ding, M. Zhu and H. Wang, *J. Am. Chem. Soc.*, 2017, **139**, 9771–9774.
- 14 Y. Liu, Y. Su, X. Quan, X. Fan, S. Chen, H. Yu, H. Zhao, Y. Zhang and J. Zhao, *ACS Catal.*, 2018, **8**, 1186–1191.
- 15 S. Mukherjee, D. A. Cullen, S. Karakalos, K. X. Liu, H. Zhang, S. Zhao, H. Xu, K. L. More, G. F. Wang and G. Wu, *Nano Energy*, 2018, **48**, 217–226.
- 16 Y. Song, D. Johnson, R. Peng, D. K. Hensley, P. V. Bonnesen, L. Liang, J. Huang, F. Yang, F. Zhang, R. Qiao, A. P. Baddorf, T. J. Tschaplinski, N. L. Engle, M. C. Hatzell, Z. Wu, D. A. Cullen, H. M. Meyer, B. G. Sumpter and A. J. Rondinone, *Sci. Adv.*, 2018, **4**, e1700336.

- 17 X. Zhang, T. Wu, H. Wang, R. Zhao, H. Chen, T. Wang, P. Wei, Y. Luo, Y. Zhang and X. Sun, *ACS Catal.*, 2019, **9**, 4609–4615.
- 18 H. Y. Chen, X. J. Zhu, H. Huang, H. B. Wang, T. Wang, R. B. Zhao, H. G. Zheng, A. M. Asiri, Y. L. Luo and X. P. Sun, *Chem. Commun.*, 2019, **55**, 3152–3155.
- 19 C. Chen, D. Yan, Y. Wang, Y. Zhou, Y. Zou, Y. Li and S. Wang, *Small*, 2019, **15**, 1805029.
- 20 M. Shi, D. Bao, B. Wulan, Y. Li, Y. Zhang, J. Yan and Q. Jiang, *Adv. Mater.*, 2017, **29**, 1606550.
- 21 S. Li, D. Bao, M. Shi, B. Wulan, J. Yan and Q. Jiang, *Adv. Mater.*, 2017, **29**, 1700001.
- 22 M. Nazemi, S. R. Panikkanvalappil and M. A. El-Sayed, *Nano Energy*, 2018, **49**, 316–323.
- 23 H. K. Lee, C. S. L. Koh, Y. H. Lee, C. Liu, I. Y. Phang, X. Han, C.-K. Tsung and X. Y. Ling, *Sci. Adv.*, 2018, **4**, eaar3208.
- 24 J. Wang, L. Yu, L. Hu, G. Chen, H. Xin and X. Feng, *Nat. Commun.*, 2018, **9**, 1795.
- 25 V. Kordali, G. Kyriacou and C. Lambrou, *Chem. Commun.*, 2000, **0**, 1673–1674.
- 26 Z. Geng, Y. Liu, X. Kong, P. Li, K. Li, Z. Liu, J. Du, M. Shu, R. Si and J. Zeng, *Adv. Mater.*, 2018, **30**, 1803498.
- 27 Y.-C. Hao, Y. Guo, L.-W. Chen, M. Shu, X.-Y. Wang, T.-A. Bu, W.-Y. Gao, N. Zhang, X. Su, X. Feng, J.-W. Zhou, B. Wang, C.-W. Hu, A.-X. Yin, R. Si, Y.-W. Zhang and C.-H. Yan, *Nat. Catal.*, 2019, **2**, 448–456.
- 28 K. Chu, Y.-p. Liu, Y.-b. Li, H. Zhang and Y. Tian, *J. Mater. Chem. A*, 2019, **7**, 4389–4394.
- 29 M. Wang, S. Liu, T. Qian, J. Liu, J. Zhou, H. Ji, J. Xiong, J. Zhong and C. Yan, *Nat. Commun.*, 2019, **10**, 341.
